# Supplementary material for: Electrochemiluminescence Aptasensor Based on Gd(OH)3 Nanocrystalline for Ochratoxin A Detection in Food Samples
Source: MDPI journal article supplement (doi:10.3390/bios12121141), 2022-12-07
Supplement: s1 [file s1]

# Electrochemiluminescence Aptasensor Based on $\text{Gd}(\text{OH})_3$ Nanocrystalline for Ochratoxin A Detection in Food Samples

Chunyuan Tian, Minggang Wei, Xiaobin Wang, Qing Hua, Feiyan Tang, Lijun Zhao, Xuming Zhuang \* and Feng Luan \*

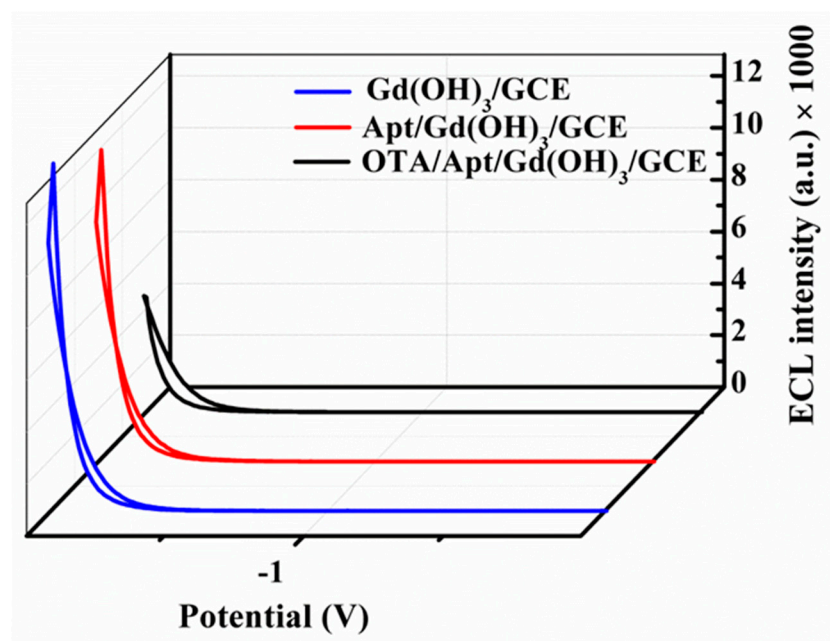

**Figure S1.** ECL intensity versus potential for  $\text{Gd}(\text{OH})_3/\text{GCE}$ ,  $\text{Apt}/\text{Gd}(\text{OH})_3/\text{GCE}$  and  $\text{OTA}/\text{Apt}/\text{Gd}(\text{OH})_3/\text{GCE}$ .

**Table S1.** Comparison of different methods for the detection of OTA.

| Methods          | Linear range ( $\text{ng mL}^{-1}$ ) | LOD ( $\text{pg mL}^{-1}$ ) | Ref.      |
|------------------|--------------------------------------|-----------------------------|-----------|
| Fluorescence     | 0.001~0.05                           | 0.2                         | [1]       |
| EC <sup>a</sup>  | 0.01 ~ $10^4$                        | 110                         | [2]       |
| PEC <sup>b</sup> | $10^{-4}$ ~200                       | 0.0035                      | [3]       |
| EC               | 0.03~10                              | 13.3                        | [4]       |
| ECL              | $10^{-5}$ ~10                        | 0.0027                      | This work |

<sup>a</sup>Electrochemistry <sup>b</sup>Photoelectrochemistry.

**Table S2.** Determination of IM in fish by the proposed method and the HPLC Method (n=3).

| Sample | Added ( $\text{ng/mL}$ ) | Amount found by ECL method ( $\text{ng/mL}$ ) | Amount Found by HPLC Method ( $\text{ng/mL}$ ) | Relative error (%) |
|--------|--------------------------|-----------------------------------------------|------------------------------------------------|--------------------|
| Corn   | 1.0                      | 0.98                                          | 0.96                                           | 2%                 |

## References

- [1] Zhang, J.; Xia, Y. K.; Chen, M.; Wu, D. Z.; Cai, S. X.; Liu, M. M.; He, W. H.; Chen, J. H. A fluorescent aptasensor based on DNA-scaffolded silver nanoclusters coupling with  $\text{Zn}(\text{II})$ -ion signal-enhancement for simultaneous detection of OTA and AFB1. *Sensor. Actuat. B-Chem.* **2016**, 235(1),79-85.
- [2] Barthelmebs, L.; Hayat A.; Limiadi, A. W.; Marty, J. L. Noguier, T. Electrochemical DNA aptamer-based biosensor for OTA detection, using superparamagnetic nanoparticles. *Sensor. Actuat. B-Chem.* **2021**, 156(2), 932-937.

- [3] Feng, J. H.; Qian, Y. R.; Cheng, Q.; Ma, Y. M.; Wu, D.; Ma, H. M.; Ren, X.; Wang, X. Y.; Wei, Q. A signal amplification of pDNA@Ag<sub>2</sub>S based photoelectrochemical competitive sensor for the sensitive detection of OTA in microfluidic devices. *Biosens. Bioelectron.* **2020**, *168*(15), 112503.
- [4] Zhu, C. X.; Liu, D.; Li, Y. Y.; Ma, S.; Wang, M.; You, T.Y. Hairpin DNA assisted dual-ratiometric electrochemical aptasensor with high reliability and anti-interference ability for simultaneous detection of aflatoxin B1 and ochratoxin A. *Biosens. Bioelectron.* **2021**, *175*(15), 112654.
